# Supplementary material for: Improving the prediction of mRNA extremities in the parasitic protozoan Leishmania
Source: PubMed Central journal article supplement (PMC2335281; doi:10.1186/1471-2105-9-158), 2008-03-20
Supplement: 1471-2105-9-158-S1.pdf [file 1471-2105-9-158-S1.pdf]

**Additional File 1 – GenBank accession Ids of polyadenylated ESTs for *Leishmania infantum***

See Methods for more information on search parameters.

|          |          |          |          |
|----------|----------|----------|----------|
| CV670622 | CV666605 | CV667398 | CV664554 |
| CV670278 | CV664280 | CV667385 | CV664463 |
| CV670124 | CV670675 | CV667347 | CV664400 |
| CV670078 | CV670639 | CV667232 | CV664287 |
| CV670050 | CV670623 | CV666826 | CV664282 |
| CV670037 | CV670467 | CV666690 | CV664268 |
| CV670031 | CV670463 | CV666586 | CV664255 |
| CV670015 | CV670444 | CV666576 | CV664242 |
| CV670011 | CV670436 | CV666568 | CV664154 |
| CV669673 | CV670417 | CV666518 | CV664102 |
| CV669580 | CV670284 | CV666500 | CV664094 |
| CV669553 | CV670279 | CV666454 | CV664028 |
| CV665459 | CV670119 | CV666429 | CV664006 |
| CV669548 | CV670097 | CV666427 | CV663984 |
| CV669103 | CV669957 | CV666389 | CV663977 |
| CV668879 | CV669949 | CV666323 | CV663968 |
| CV668764 | CV669922 | CV666258 | CV663966 |
| CV668103 | CV669890 | CV666121 | CV663941 |
| CV667818 | CV669846 | CV666101 | CV663871 |
| CV667706 | CV669835 | CV666093 | CV663850 |
| CV667665 | CV669821 | CV666087 | CV663778 |
| CV667646 | CV669819 | CV666084 | CV663715 |
| CV667639 | CV669799 | CV666073 | CV663605 |
| CV667625 | CV669790 | CV666071 | CV663591 |
| CV667619 | CV669752 | CV666056 | CV663579 |
| CV667005 | CV669741 | CV666038 | CV663564 |
| CV666662 | CV669706 | CV665948 | CV663464 |
| CV666468 | CV669691 | CV665911 | CV663132 |
| CV662176 | CV669653 | CV665909 | CV662998 |
| CV667598 | CV669592 | CV665901 | CV662943 |
| CV667575 | CV669583 | CV665859 | CV662751 |
| CV667542 | CV669563 | CV665846 | CV662543 |
| CV667358 | CV669476 | CV665815 | CV662518 |
| CV667347 | CV669453 | CV665766 | CV662516 |
| CV667338 | CV669387 | CV665702 | CV662488 |
| CV667325 | CV669248 | CV665682 | CV662290 |
| CV667210 | CV669211 | CV665566 | CV662231 |
| CV667167 | CV669091 | CV665540 | CV662152 |
| CV667149 | CV668957 | CV665362 | CV662127 |
| CV667147 | CV668840 | CV665328 | CV661979 |
| CV667104 | CV668518 | CV665288 | CV661923 |
| CV667102 | CV668486 | CV665232 | CV661857 |
| CV667085 | CV668435 | CV665225 | CV661842 |
| CV666990 | CV668434 | CV665041 | CV661832 |
| CV666905 | CV668356 | CV665020 | CV661828 |
| CV666863 | CV668213 | CV664992 | CV661695 |
| CV666798 | CV668181 | CV664948 | CV661552 |
| CV666794 | CV668178 | CV664863 | CV661459 |
| CV666789 | CV668130 | CV664795 | CV661168 |
| CV666769 | CV668096 | CV664644 | CV660981 |
| CV666760 | CV668014 | CV664627 | CV660962 |
| CV666735 | CV667999 | CV664599 | CV660927 |
| CV666724 | CV667777 | CV664591 | AJ276158 |
| CV666719 | CV667565 | CV664588 |          |
| CV666609 | CV667515 | CV664585 |          |
